# Supplementary material for: Randomized Crossover Clinical Trial of Nicotinamide Riboside and Coenzyme Q10 on Metabolic Health and Mitochondrial Bioenergetics in CKD
Source: PubMed Central journal article supplement (PMC11370499; doi:10.1101/2024.08.23.24312501), 2024-08-23

**Supplemental Figure 1. CONSORT diagram illustrating data completeness of the various outcomes in the Cross-over Randomized Controlled Trial of Coenzyme Q10 and Nicotinamide Riboside in CKD (CoNR Trial).**

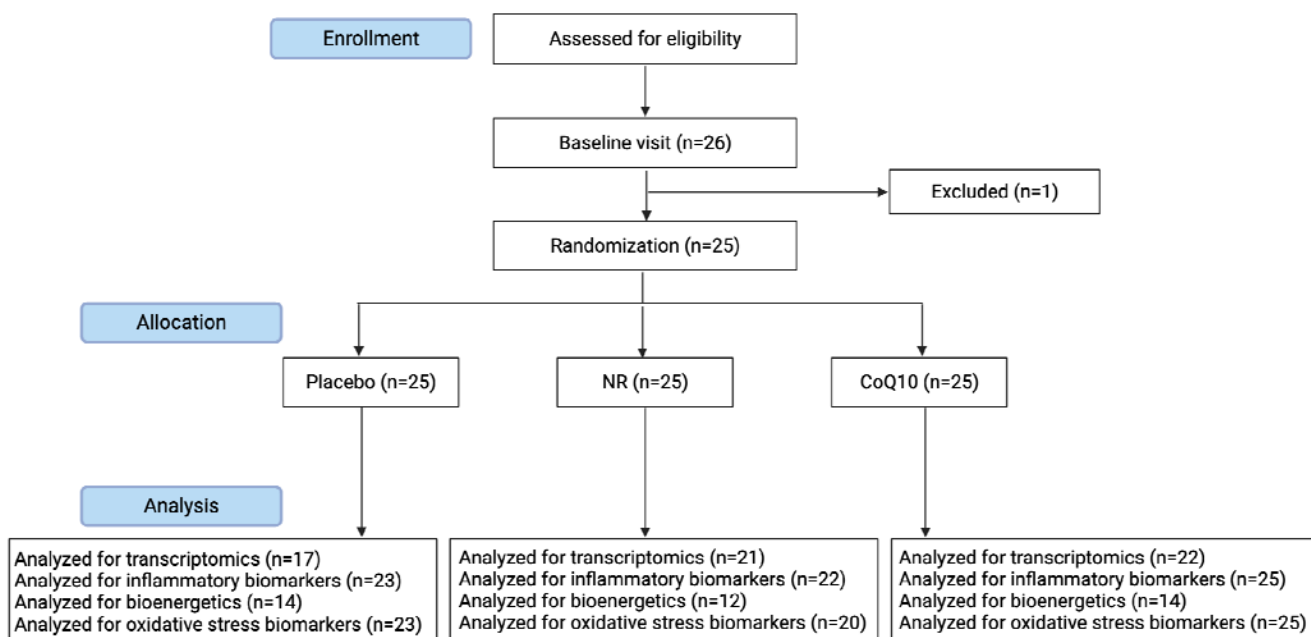

**Supplemental Figure 2. Study design and sample size of the Cross-over Randomized Controlled Trial of Coenzyme Q10 and Nicotinamide Riboside in CKD (CoNR Trial).**

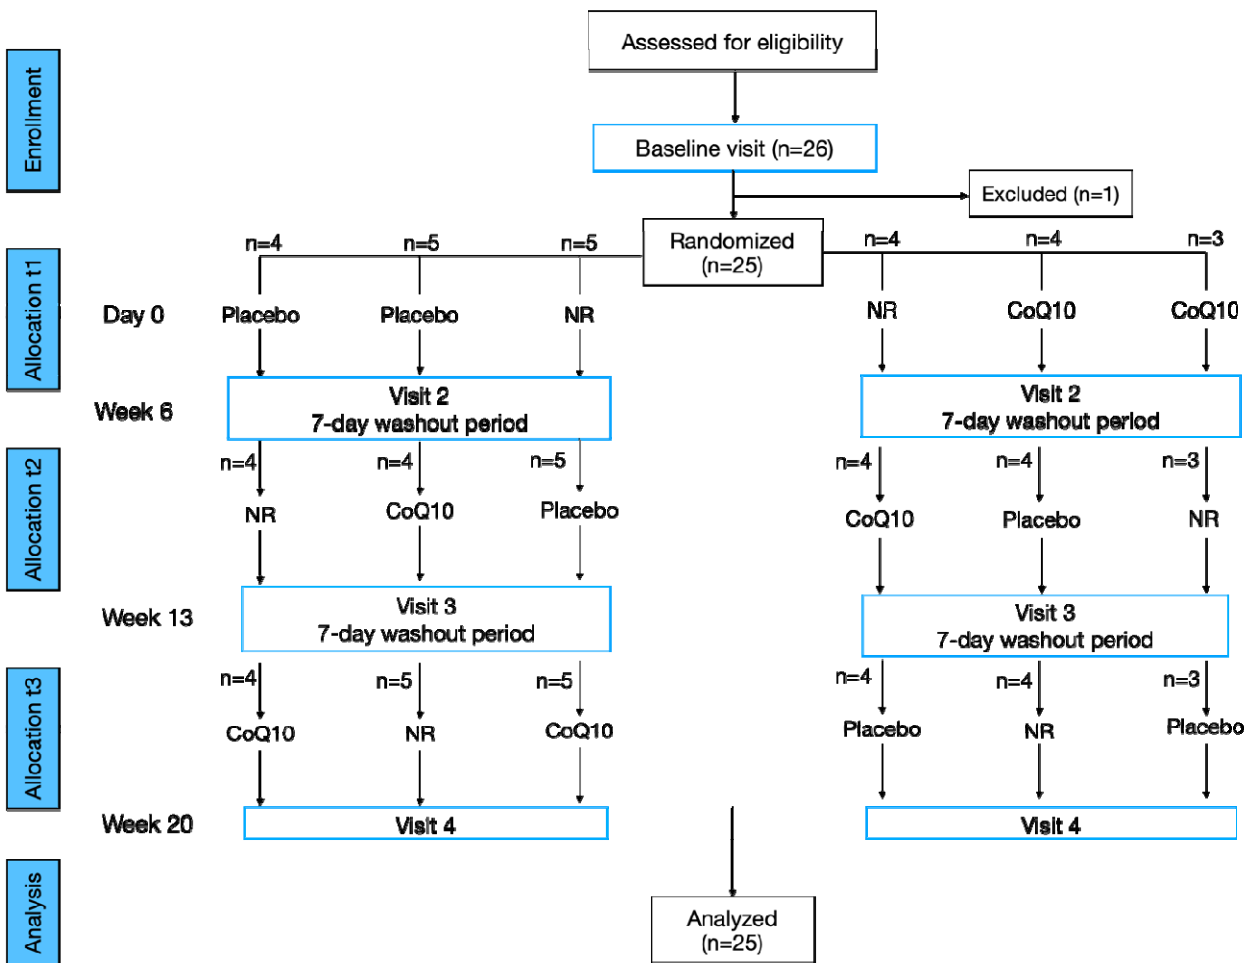

**Supplemental Figure 3. Gene ontology analysis representing altered molecular functions (mf) in whole blood (A) post NR and B) CoQ10 supplementation. Bars represent the P-value (-Log<sub>10</sub>). Top 20 terms are shown.**

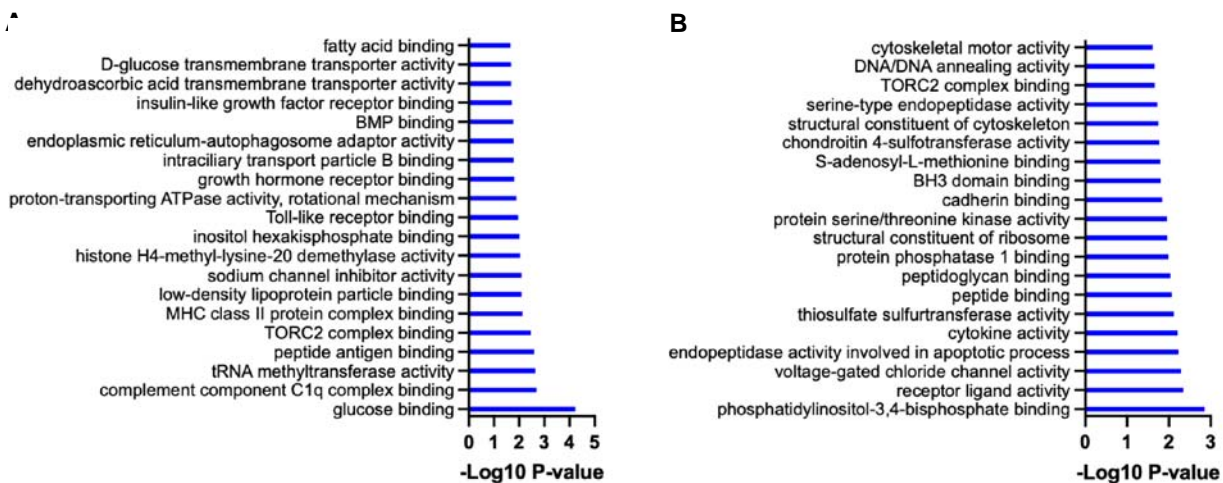

**Supplemental Table 1. Sub-population characteristics of participants with monocyte and lymphocyte bioenergetics (n=14) compared to the entire cohort (n=25).**

| <b>Baseline characteristics</b>                    | <b>N=14</b>  | <b>N=25</b> |
|----------------------------------------------------|--------------|-------------|
| Age (years), mean (SD)                             | 58.7 (12.7)  | 61.0 (11.6) |
| Male, n (%)                                        | 7 (50)       | 15 (60.0)   |
| Race, n (%)                                        |              |             |
| Asian                                              | 1 (7)        | 3 (12.0)    |
| Black/African-American                             | 1 (7)        | 1 (4.0)     |
| Hispanic                                           | 0 (0)        | 1 (4.0)     |
| Native Hawaiian/Pacific Islander                   | 0 (0)        | 1 (4.0)     |
| White                                              | 12 (85)      | 20 (80.0)   |
| BMI (kg/m <sup>2</sup> ), mean (SD)                | 26.7 (4.6)   | 27.7 (5.2)  |
| SBP (mmHg), mean (SD)                              | 130.7 (27)   | 129 (22)    |
| eGFR (mL/min/1.73m <sup>2</sup> ), mean (SD)       | 36.2 (7.2)   | 36.9 (9.2)  |
| Serum triglyceride (mg/dL), mean (SD)              | 162 (98)     | 166 (107)   |
| Serum HDL (mg/dL), mean (SD)                       | 57 (17)      | 58 (17)     |
| Serum LDL (mg/dL), mean (SD)                       | 107 (38)     | 94 (33)     |
| Physical activity past month (hours), median (IQR) | 28 (0.3, 35) | 13 (2, 30)  |
| Six-minute walking distance (meters), mean (SD)    | 432 (66)     | 414 (69)    |
| VO <sub>2</sub> peak (mL/kg/min), mean (SD)        | 22 (4.2)     | 21 (4.5)    |
| ADL score, mean (SD)                               | 8.0 (0)      | 8.0 (0.2)   |
| Diabetes, n (%)                                    | 2 (14.0)     | 4 (16.0)    |
| Current smoker, n (%)                              | 2 (14.0)     | 3 (12.0)    |
| ACE/ARB, n (%)                                     | 11 (78)      | 18 (72.0)   |
| Statins, n (%)                                     | 7 (50)       | 14 (56.0)   |
| Erythropoietin, n (%)                              | 0 (0)        | 1 (4.0)     |

**Abbreviations:** Chronic kidney disease was defined as estimated glomerular filtration rate <60 ml/min per m<sup>2</sup>. SD, standard deviation; IQR, interquartile range; SBP, systolic blood pressure; eGFR, estimated

glomerular filtration rate; ADL, Activities of Daily Living, ACE/ARB, angiotensin converting enzyme inhibitors/ angiotensin-receptor blockers.

**Supplemental Table 2. Summary of secondary outcome of plasma inflammatory biomarkers comparing NR and CoQ10 with placebo.** Linear mixed effects modeling was used to estimate treatment effects compared to placebo. Unadjusted P-values, **effect sizes**, and 95% CIs are shown. The comparisons that withstood multiple comparison adjustment are shown in bold.

| <b>Endpoint</b>       | <b>NR vs placebo<br/>Effect size<br/>(95% CI)</b> | <b>NR vs<br/>placebo<br/>P-value</b> | <b>CoQ10 vs<br/>placebo<br/>Effect size<br/>(95% CI)</b> | <b>CoQ10 vs<br/>placebo<br/>P-value</b> |
|-----------------------|---------------------------------------------------|--------------------------------------|----------------------------------------------------------|-----------------------------------------|
| sCRP, mg/dL           | -0.32 (-0.91 to 0.29)                             | 0.13                                 | -0.45 (-1.05 to -0.17)                                   | 0.04                                    |
| IL-6, pg/mL           | 0.14 (-0.44 to 0.73)                              | 0.48                                 | -0.11 (-0.67 to 0.46)                                    | 0.52                                    |
| IL-10, pg/mL          | 0.23 (-0.36 to 0.81)                              | 0.10                                 | -0.1 (-0.67 to 0.46)                                     | 0.57                                    |
| IL-12, pg/mL          | 0.2 (-0.39 to 0.78)                               | 0.07                                 | 0.03 (-0.53 to 0.6)                                      | 0.61                                    |
| IL-13, pg/mL          | -0.35 (-0.97 to 0.27)                             | 0.05                                 | -0.37 (-0.1 to -0.25)                                    | <b>0.02</b>                             |
| IL-2, pg/mL           | 0.65 (0.04 to 1.24)                               | <b>&lt;0.01</b>                      | 0.25 (-0.33 to 0.81)                                     | 0.17                                    |
| IL-4, pg/mL           | -0.13 (-0.71 to 0.46)                             | 0.41                                 | -0.37 (-0.94 to 0.02)                                    | 0.16                                    |
| IL-8, pg/mL           | 0.06 (-0.51 to 0.63)                              | 0.72                                 | 0.01 (-0.56 to 0.57)                                     | 0.97                                    |
| TNF- $\alpha$ , pg/mL | 0.26 (-0.32 to 0.85)                              | 0.13                                 | 0.01 (-0.56 to 0.57)                                     | 0.95                                    |
| IFN- $\gamma$ , pg/mL | 0.55 (-0.06 to 1.15)                              | 0.12                                 | 0.06 (-0.51 to 0.62)                                     | 0.80                                    |

**Supplemental Table 3. Summary of secondary outcome of plasma inflammatory biomarkers comparing NR and CoQ10 with placebo.** Linear mixed effects modeling was used to estimate treatment effects compared to placebo. Unadjusted P-values, mean differences, and 95% CI are shown. The comparisons that withstood multiple comparison adjustment are shown in bold.

| Endpoint                        | Mean placebo (SD) | NR vs placebo (95% CI) | NR vs placebo P-value | CoQ10 vs placebo (95% CI) | CoQ10 vs placebo P-value |
|---------------------------------|-------------------|------------------------|-----------------------|---------------------------|--------------------------|
| F2 Isoprostanes, pg/mL          | 1.26 (0.41)       | 0.28 (0.00 to 0.25)    | 0.05                  | -0.02 to 0.23             | 0.09                     |
| 5 series F2 Isoprostanes, pg/mL | 1.1 (0.4)         | -0.16 (-0.28 to -0.03) | <b>0.02</b>           | -0.11 (-0.22 to 0.00)     | <b>0.04</b>              |
| 5-F2t-IsoP, pg/mL               | 0.27 (0.12)       | -0.04 (-0.07 to -0.01) | <b>&lt;0.01</b>       | -0.03 (-0.06 to 0.00)     | <b>0.03</b>              |
| 5-F2c-IsoP, pg/mL               | 0.86 (0.31)       | -0.09 (-0.18 to 0.02)  | 0.06                  | -0.07 (-0.16 to 0.03)     | 0.17                     |
| 15-F2t-IsoP, pg/mL              | 0.15 (0.05)       | 0.00 (-0.02 to 0.02)   | 0.78                  | 0.00 (-0.02 to 0.02)      | 0.96                     |

**Supplemental Figure 4. Oxygen consumption rates of A) monocytes and C) T-cells and extracellular acidification rates (ECAR) of B) monocytes and D) T-cells measured by an XFe24 Seahorse Analyzer (n=14). The Cell Mito Stress test involved an injection of 1 $\mu$ M oligomycin (OMY), followed by an injection of 0.6-1.0  $\mu$ M carbonyl cyanide-4-(trifluoromethoxy)phenylhydrazone (FCCP), and an injection of 10 $\mu$ M antimycin A (AMA) in a XFe24 Analyzer. Data are normalized to cell number per well. Data expressed as mean $\pm$ SEM.**

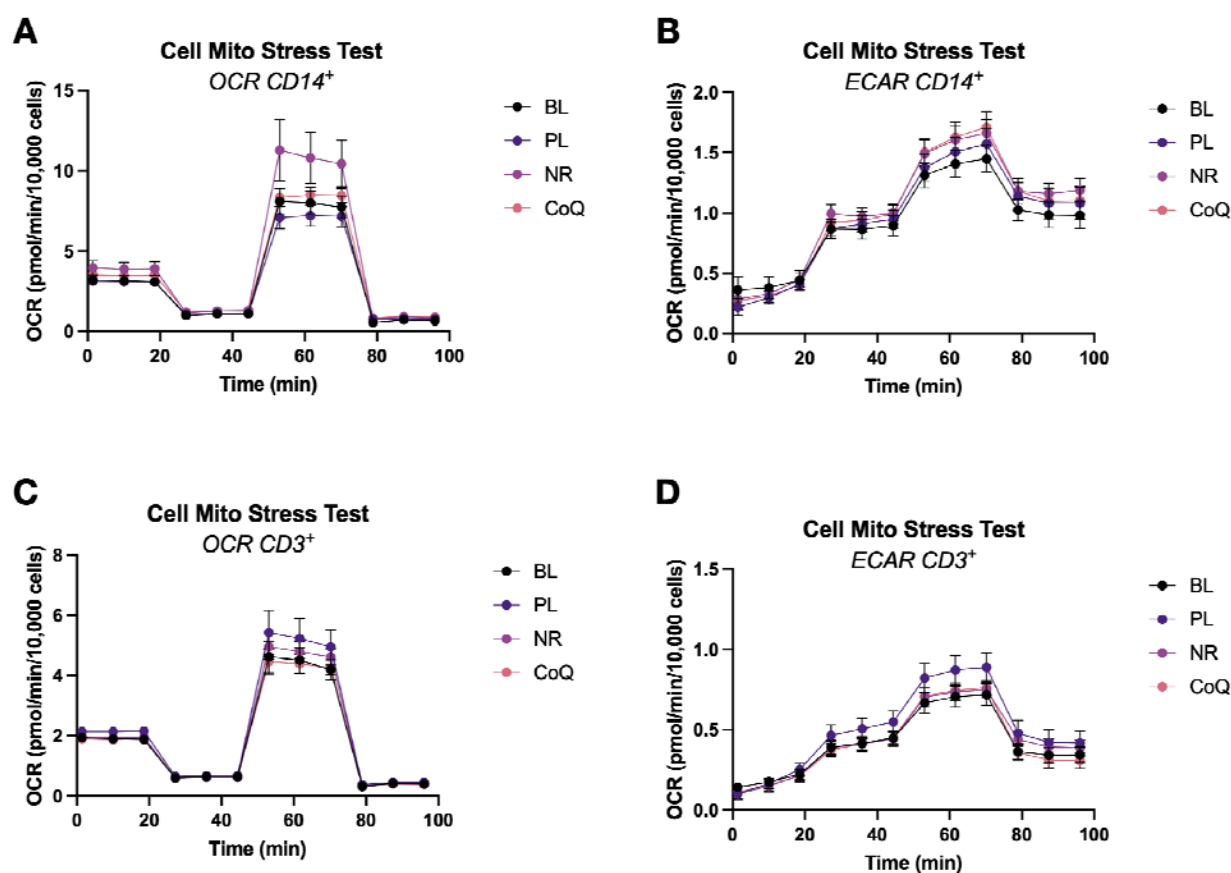

**Supplemental Figure 5. The effects of nicotinamide riboside (NR), and coenzyme Q 10 (CoQ10) on T-cell (CD3<sup>+</sup>) bioenergetics (n=14).** Bioenergetic parameters include A) basal respiration, B) proton leak respiration, C) maximal respiratory capacity E) spare respiratory capacity, E) ATP-linked respiration, F) bioenergetic health index, calculated by the log [(ATP-linked respiration x spare respiratory capacity)/(proton leak x non-mitochondrial respiration)]. The box plots represent median and IQR and the whiskers represent minimum and maximum values. \*P<0.05 compared to placebo.

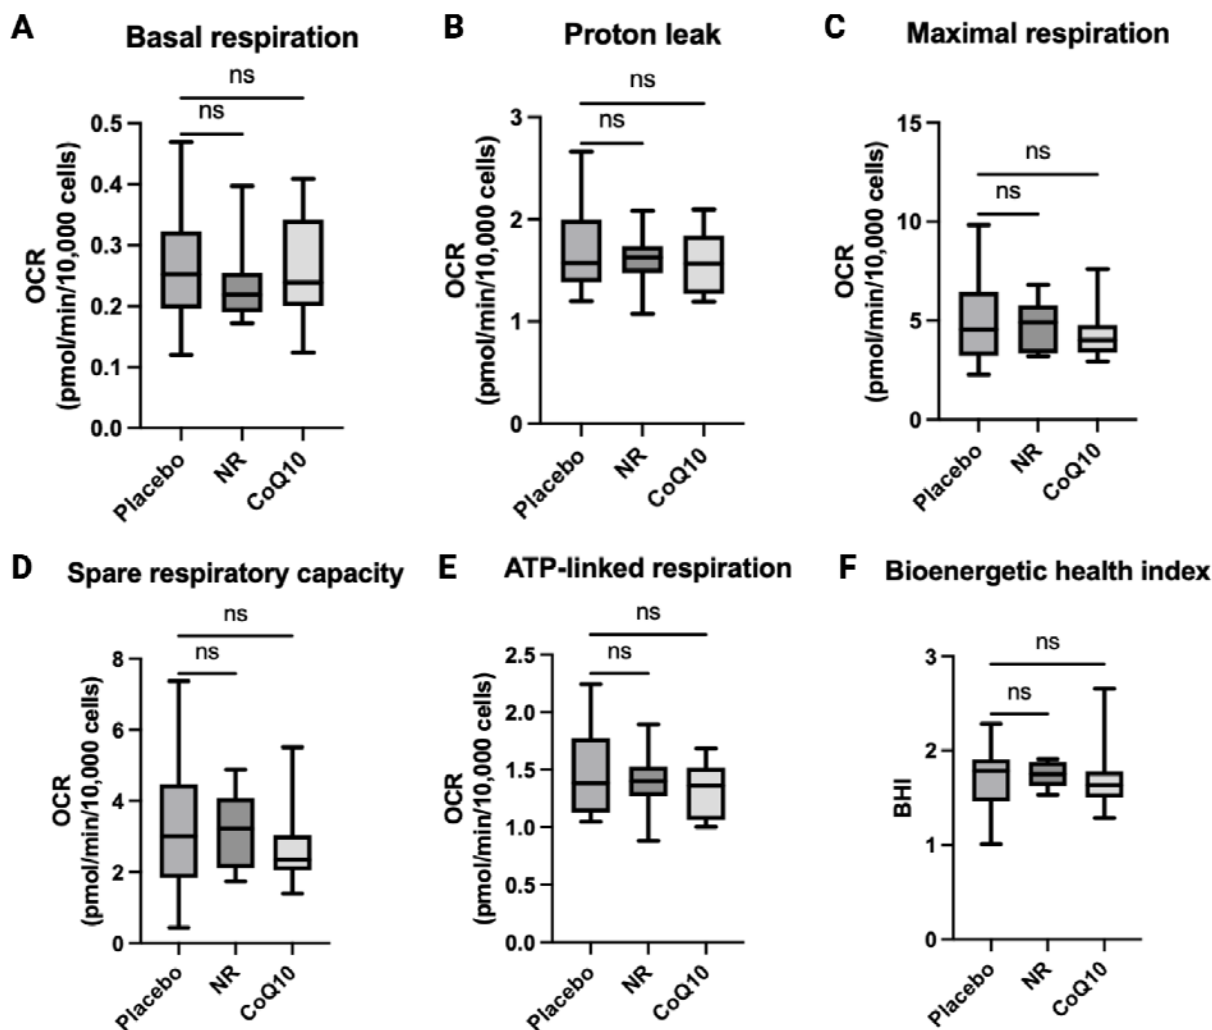

Supplement: NIHPP2024.08.23.24312501v1-supplement-1.pdf [file NIHPP2024.08.23.24312501v1-supplement-1.pdf]
